# Supplementary material for: Identification of the dopamine transporter SLC6A3 as a biomarker for patients with renal cell carcinoma
Source: PubMed Central journal article supplement (PMC4736613; doi:10.1186/s12943-016-0495-5), 2016-02-02

## Identification of the dopamine transporter SLC6A3 as biomarkers for patients with renal cell carcinoma

Sarah Schrödter; Martin Braun; Niklas Kümper; Mario Deng; Isabella Syring; Doris Schmidt; Sven Perner; Stefan C Müller; Jörg Ellinger

### Supplementary Table S1

List of qPCR primer sequences used for the validation study.

| Gene Symbol | Ensembl ID      | Forward Primer          | Reverse Primer          |
|-------------|-----------------|-------------------------|-------------------------|
| NDUFA4L2    | ENST00000555173 | CGCTTTACTTGCTGCGACT     | GGCTCCGGGTTGTTCTTT      |
| NPTX2       | ENST00000265634 | GAGAAGTCCCTGCTGCACAA    | CTATTGCCTCGCTCCAGCTC    |
| FABP6       | ENST00000523955 | TGAGAGCTGTGTTGTCTGCG    | CTGCTGGGAGGCTTTCCTTT    |
| TNFAIP6     | ENST00000460812 | GGCCCAACTGTGGATTTGGA    | TCCTTTGCGTGTGGGTTGTA    |
| SLC6A3      | ENST00000270349 | TCACCAACGGTGGCATCTAC    | CACTCCGATGGCTTCGATGA    |
| SPINK13     | ENST00000511106 | CCACCTCATCCAGGCCTTATC   | AATCTTGTGGGGAAAGGCAG    |
| ENPP3       | ENST00000358229 | TGTCACGGGCTTGTATCCAG    | TGCCACCAGGCTGGATTATT    |
| SLC12A1     | ENST00000380993 | CCATGCCTCTTATGCCAAAT    | CACATGTTGTAAATTCCATACGC |
| KNG1        | ENST00000432028 | TCAACCACTGGGAATGATCTCAC | TCGCAGGACCTTAGGTGACTA   |
| FXYD4       | ENST00000476166 | CTCGCAGGACACTGGTGAAG    | TGCTTGTGGGGAGATCTTGG    |
| SLC13A3     | ENST00000279027 | TTGCTGGTACAAAGACATGGT   | TGGTCTGTGCCCAGGTATTC    |
| GCGR        | ENST00000400723 | CCGCGCGGACCCTGA         | GAGTGGCAGAGCAGCAGAG     |
| NPHS2       | ENST00000367615 | GCCCGAGGAAGGTACCAAAT    | CGCAGAACCAGATGGAAAAAGG  |
| PLG         | ENST00000461414 | AACAAGCGCTGGGAACCTT     | CACTGGTAGGTGGGACCAGA    |
| PPIA        | ENST00000321231 | ATGCTGGACCCAACACAAAT    | TCTTCACTTTGCCAAACACC    |
| ACTB        | ENST00000462494 | CCACCGCGAGAAGATGA       | CCAGAGGCGTACAGGGATAG    |
| TBP         | ENST00000230354 | GAACATCATGGATCAGAACAACA | ATAGGGATTCCGGGAGTCAT    |

### Supplementary Figure S1

Visualization of the gene expression data retrieved from the NextBio database.

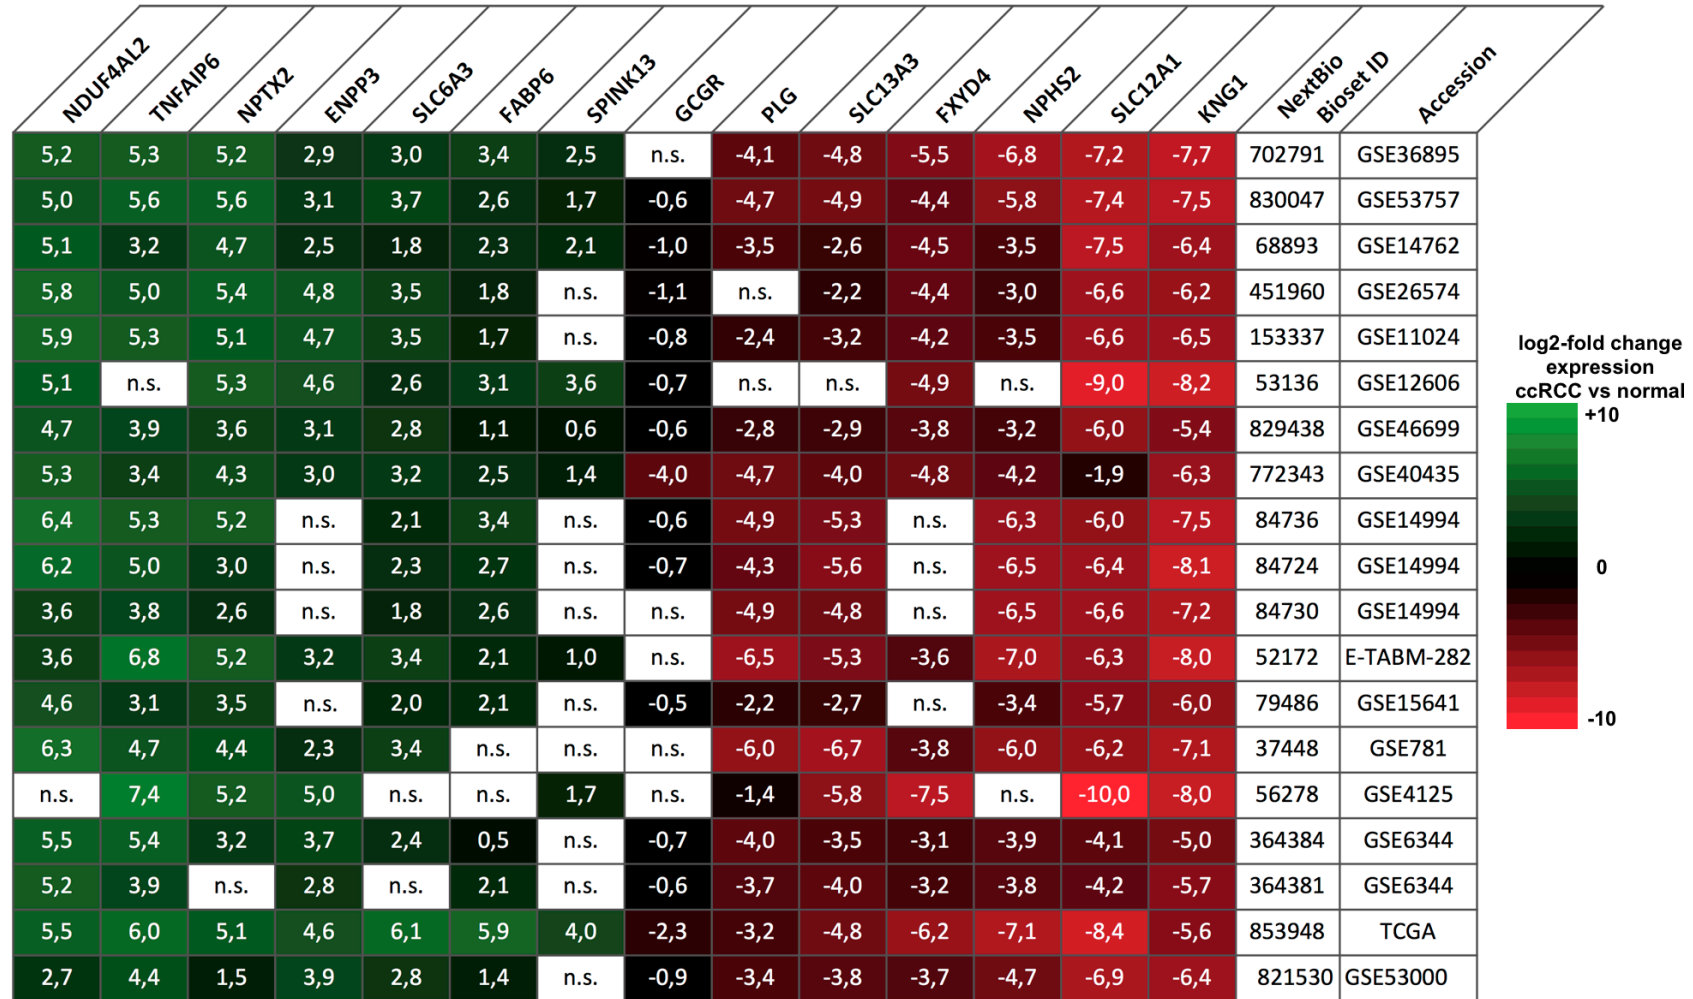

### Supplementary Figure S2

Kaplan Meier estimate for SLC6A3 expression and overall survival in patients with clear cell renal cell carcinoma from The Cancer Genome Atlas (TCGA) cohort using the cBio Cancer Genomics Portal. Patients with higher expression levels of SLC6A3 (n=26; 5%) have a poor outcome (p=0.005). Note that overexpression was defined as higher expression levels within the tumor tissues and not compared to normal tissue in the cBioPortal.

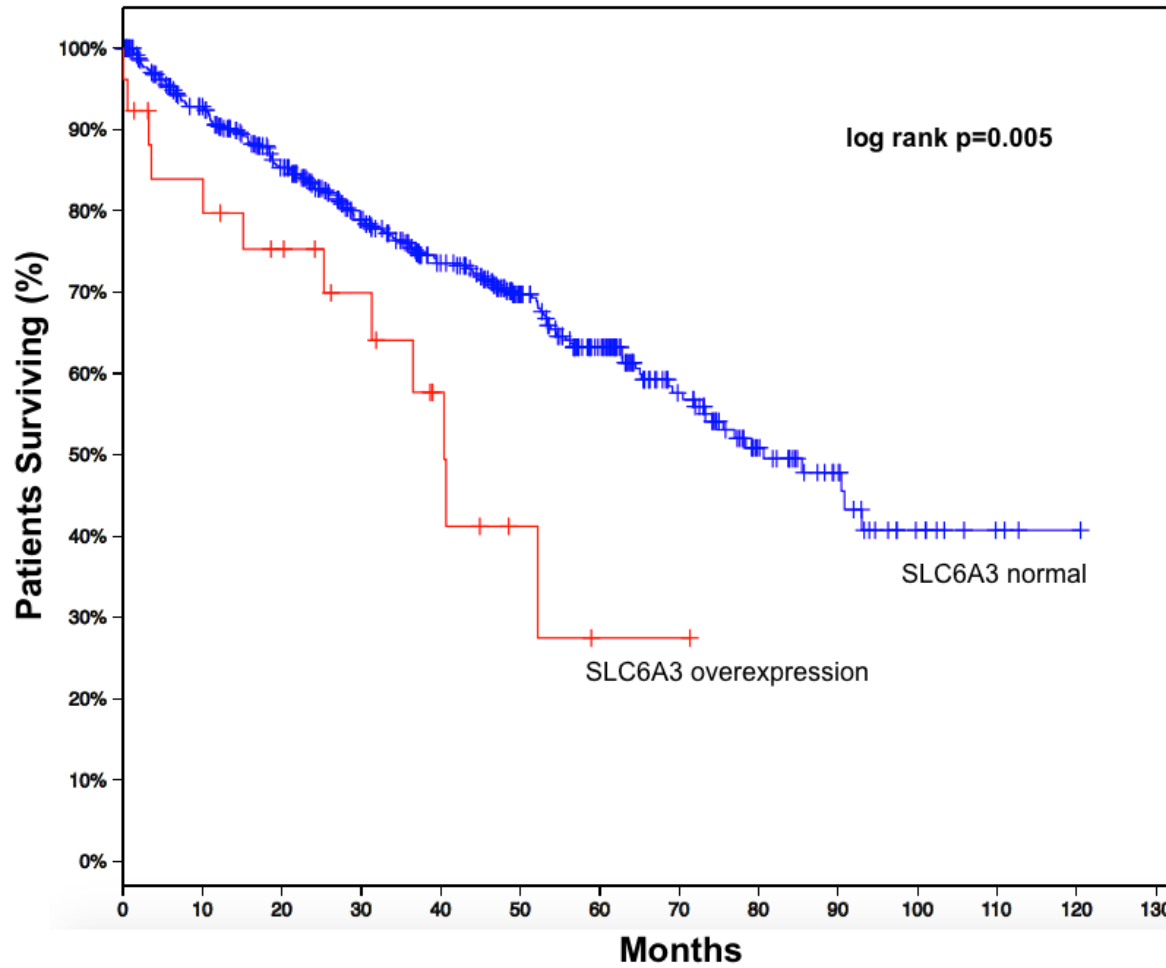

Supplement: 12943_2016_495_MOESM1_ESM.pdf [file 12943_2016_495_MOESM1_ESM.pdf]
